# Supplementary material for: Predicting the aggregation number of cationic surfactants based on ANN-QSAR modeling approaches: understanding the impact of molecular descriptors on aggregation numbers
Source: RSC Adv. 2022 Nov 24;12(52):33666–78. doi: 10.1039/d2ra06064g (PMC9685374; doi:10.1039/d2ra06064g)
Supplement: RA-012-D2RA06064G-s001 [file RA-012-D2RA06064G-s001.xlsx]

## Sheet: total1
		MW	AMW	Sv	Se	Sp	Ss	Mv	Me	Mp	Ms	nAT	nSK	nBT	nBO	nBM	SCBO	ARR	nCIC	nCIR	RBN	RBF	nDB	nAB	nH	nC	nN	nO	nR05	nR06	nBnz	ZM1	ZM1V	ZM2	ZM2V	Qindex	SNar	HNar	GNar	Xt	Dz	Ram	Pol	LPRS	VDA	MSD	SMTI	SMTIV	GMTI
1	16	664.29	5.15	71.3	124.77	77.71	80.67	0.55	0.97	0.6	1.68	129	48	130	49	12	55	0.245	2	2	30	0.231	0	12	81	45	3	0	0	2	2	220	304	235	321	17	31.833	1.834	1.941	0.177	97.5	9	58	301.441	550.208	0.295	52704	58762	52053
2	31	499.04	4.75	54.82	101.57	60.35	57.5	0.52	0.97	0.57	1.64	105	35	104	34	0	34	0	0	0	28	0.269	0	0	70	32	2	1	0	0	0	146	178	148	164	6	21.488	1.75	1.848	0.216	72	4	36	204.022	349.486	0.357	23420	24476	22118
3	31	481.02	4.72	53.72	98.36	59.14	55	0.53	0.96	0.58	1.62	102	34	101	33	1	34	0	0	0	26	0.257	1	0	68	32	2	0	0	0	0	142	152	144	153	6	20.794	1.744	1.843	0.219	69	4	35	195.986	327.706	0.355	21304	21792	20073
4	25	531.08	4.92	58.31	104.25	63.9	62.33	0.54	0.97	0.59	1.64	108	38	108	38	6	41	0.158	1	1	26	0.241	0	6	70	36	2	0	0	1	1	168	202	177	215	11	24.378	1.795	1.899	0.203	77	6	44	221.894	354.79	0.305	26360	28068	25388
5	27	304.6	5.08	33.05	57.95	36.09	37.17	0.55	0.97	0.6	1.69	60	22	60	22	6	25	0.273	1	1	13	0.217	0	6	38	21	1	0	0	1	1	96	128	100	134	7	14.268	1.821	1.913	0.265	44.5	3	23	107.338	134.546	0.354	5886	6782	5644
6	70	308.58	5.32	31.54	56.54	34.21	37	0.54	0.97	0.59	1.68	58	22	59	23	2	25	0	2	2	11	0.186	2	0	36	18	4	0	2	0	0	102	158	110	159	10	15.485	1.941	2.022	0.254	46	4	21	108.647	141.909	0.375	6584	7858	6725
7	39	280.52	5.39	28.34	50.78	30.68	34	0.55	0.98	0.59	1.7	52	20	53	21	2	23	0	2	2	9	0.17	2	0	32	16	4	0	2	0	0	94	150	102	151	10	14.099	1.935	2.024	0.266	42	4	19	94.469	114.4	0.367	4850	5862	4939
8	16	252.46	5.49	25.15	45.01	27.16	31	0.55	0.98	0.59	1.72	46	18	47	19	2	21	0	2	2	7	0.149	2	0	28	14	4	0	2	0	0	86	142	94	143	10	12.712	1.929	2.026	0.28	38	4	17	80.643	89.667	0.357	3444	4226	3489
9	77	160.27	5.53	15.1	28.77	16.39	27.17	0.52	0.99	0.57	2.47	29	11	28	10	1	11	0	0	0	4	0.143	1	0	18	8	1	2	0	0	0	46	120	48	102	4	5.088	1.404	1.588	0.443	24.5	4	12	37.254	30.182	0.321	600	941	454
10	44	158.25	5.86	14.5	26.88	15.63	25.33	0.54	1	0.58	2.3	27	11	27	11	1	12	0	1	1	3	0.111	1	0	16	8	1	2	1	0	0	50	129	54	113	6	6.762	1.692	1.849	0.385	24.5	3	10	37.074	29.636	0.318	668	1042	578
11	81	132.21	5.75	11.9	23	12.86	23.83	0.52	1	0.56	2.65	23	9	22	8	1	9	0	0	0	3	0.136	1	0	14	6	1	2	0	0	0	36	110	36	90	3	3.989	1.385	1.558	0.501	20.5	3	8	27.36	21.333	0.349	348	611	248
12	94	118.18	5.91	10.31	20.12	11.1	22	0.52	1.01	0.56	2.75	20	8	19	7	1	8	0	0	0	3	0.158	1	0	12	5	1	2	0	0	0	30	104	29	82	2	3.584	1.412	1.565	0.528	18.5	2	6	22.84	17.75	0.377	258	492	179
13	25	353.69	5.05	37.35	68.03	40.84	44.33	0.53	0.97	0.58	1.77	70	25	70	25	1	26	0	1	1	17	0.243	1	0	45	22	2	1	1	0	0	106	158	112	149	6	16.466	1.852	1.932	0.246	52	3	26	130.32	187.6	0.383	9274	10990	8936
14	95	355.61	5.56	34.58	63.03	37.46	53	0.54	0.98	0.59	2.12	64	25	64	25	2	27	0	1	1	15	0.234	2	0	39	20	2	3	1	0	0	110	237	119	202	8	16.06	1.796	1.901	0.25	54	4	29	128.404	173.84	0.353	8592	11920	8252
15	97	313.54	5.5	30.69	56.1	33.31	48.33	0.54	0.98	0.58	2.2	57	22	56	21	2	23	0	0	0	14	0.25	2	0	35	18	1	3	0	0	0	88	208	89	173	3	13	1.692	1.806	0.277	47.5	3	22	108.163	139.636	0.367	5770	8108	5241
16	23	195.37	5.28	20.26	35.98	22.01	24.5	0.55	0.97	0.59	1.75	37	14	37	14	5	16.5	0.357	1	1	7	0.189	0	5	23	12	2	0	1	0	0	60	98	63	103	5	9.129	1.826	1.919	0.331	29	2	12	56.267	56.857	0.382	1600	1952	1479
17	13	150.27	5.57	15.48	26.23	16.72	20.17	0.57	0.97	0.62	1.83	27	11	27	11	6	14	0.545	1	1	3	0.111	0	6	16	10	1	0	0	1	0	48	82	51	88	5	7.049	1.784	1.898	0.377	22.5	2	11	37.506	30.909	0.336	695	894	609
18	8	139.25	5.57	13.87	24.45	14.96	18.5	0.55	0.98	0.6	1.85	25	10	25	10	5	12.5	0.5	1	1	3	0.12	0	5	15	8	2	0	1	0	0	44	82	47	87	5	6.356	1.765	1.888	0.397	21	2	8	32.505	26.4	0.354	544	716	467
19	10	260.39	6.35	24.29	40.53	25.91	40.17	0.59	0.99	0.63	2.11	41	19	42	20	11	25.5	0.55	2	3	6	0.143	0	11	22	16	1	2	0	2	2	92	204	103	204	11	13.118	1.869	1.995	0.276	40.5	5	25	83.661	83.368	0.29	3306	4803	3234
20	32	372.74	4.9	39.66	73.9	43.57	45	0.52	0.97	0.57	1.73	76	26	75	25	0	25	0	0	0	21	0.28	0	0	50	23	1	2	0	0	0	104	168	102	134	3	15.942	1.763	1.846	0.25	54.5	2	23	139.65	219.846	0.414	10886	12494	10157
21	23	344.68	4.92	36.47	68.14	40.05	42	0.52	0.97	0.57	1.75	70	24	69	23	0	23	0	0	0	19	0.275	0	0	46	21	1	2	0	0	0	96	160	94	126	3	14.556	1.745	1.834	0.262	50.5	2	21	124.975	186.583	0.414	8500	9836	7875
22	9	288.56	4.98	30.08	56.6	33	36	0.52	0.98	0.57	1.8	58	20	57	19	0	19	0	0	0	15	0.263	0	0	38	17	1	2	0	0	0	80	144	78	110	3	11.784	1.702	1.803	0.291	42.5	2	17	96.634	128.1	0.413	4824	5712	4383
23	16	360.68	5.08	36.98	69.46	40.5	45.5	0.52	0.98	0.57	1.82	71	25	70	24	0	24	0	0	0	20	0.286	0	0	46	21	1	3	0	0	0	100	196	98	146	3	15.249	1.754	1.84	0.256	53.5	2	22	132.273	202.88	0.414	9644	11756	8968
24	22	316.62	4.95	33.27	62.37	36.52	39	0.52	0.97	0.57	1.77	64	22	63	21	0	21	0	0	0	17	0.27	0	0	42	19	1	2	0	0	0	88	152	86	118	3	13.17	1.725	1.82	0.276	46.5	2	19	110.627	156	0.414	6490	7586	5961
25	108	186.41	4.55	21.06	39.53	23.28	21.5	0.51	0.96	0.57	1.65	41	13	40	12	0	12	0	0	0	10	0.25	0	0	28	12	1	0	0	0	0	46	46	44	44	0	7.625	1.733	1.798	0.362	26.5	0	10	52.025	56	0.441	1346	1346	1156
26	89	200.44	4.56	22.66	42.41	25.05	22.5	0.52	0.96	0.57	1.61	44	14	43	13	0	13	0	0	0	11	0.256	0	0	30	13	1	0	0	0	0	50	50	48	48	0	8.318	1.75	1.811	0.347	28.5	0	11	58.113	65	0.439	1688	1688	1469
27	66	214.47	4.56	24.26	45.3	26.81	24.17	0.52	0.96	0.57	1.61	47	15	46	14	0	14	0	0	0	11	0.239	0	0	32	14	1	0	0	0	0	56	56	54	54	1	8.723	1.698	1.789	0.339	30.5	1	12	64.041	73.067	0.426	2038	2038	1786
28	45	209.4	5.24	21.86	38.87	23.77	26	0.55	0.97	0.59	1.73	40	15	40	15	5	17.5	0.333	1	1	8	0.2	0	5	25	13	2	0	1	0	0	64	102	67	107	5	9.822	1.837	1.925	0.319	31	2	13	62.588	66.267	0.386	1994	2406	1862
29	48	360.72	5.01	39.44	69.48	43.14	43.17	0.55	0.97	0.6	1.66	72	26	72	26	6	29	0.231	1	1	17	0.236	0	6	46	25	1	0	0	1	1	112	144	116	150	7	17.041	1.846	1.926	0.242	52.5	3	27	136.687	196.154	0.369	10146	11474	9848
30	60	382.83	4.61	43.43	79.9	47.94	42.5	0.52	0.96	0.58	1.57	83	27	82	26	0	26	0	0	0	22	0.268	0	0	56	26	1	0	0	0	0	108	108	108	108	3	16.636	1.77	1.852	0.245	54.5	2	26	144.846	219.556	0.381	11262	11262	10478
31	68	256.56	4.58	29.05	53.95	32.09	29	0.52	0.96	0.57	1.61	56	18	55	17	0	17	0	0	0	13	0.236	0	0	38	17	1	0	0	0	0	72	72	70	70	3	10.397	1.674	1.782	0.31	36.5	2	15	83.03	102.889	0.412	3470	3470	3109
32	57	228.5	4.57	25.86	48.18	28.57	26	0.52	0.96	0.57	1.63	50	16	49	15	0	15	0	0	0	11	0.224	0	0	34	15	1	0	0	0	0	64	64	62	62	3	9.011	1.641	1.756	0.333	32.5	2	13	69.857	80.375	0.41	2396	2396	2107
33	39	200.44	4.56	22.66	42.41	25.05	23	0.52	0.96	0.57	1.64	44	14	43	13	0	13	0	0	0	9	0.209	0	0	30	13	1	0	0	0	0	56	56	54	54	3	7.625	1.6	1.724	0.362	28.5	2	11	57.166	60.571	0.407	1570	1570	1345
34	4	144.32	4.51	16.27	30.88	18	17	0.51	0.96	0.56	1.7	32	10	31	9	0	9	0	0	0	5	0.161	0	0	22	9	1	0	0	0	0	40	40	38	38	3	4.852	1.481	1.625	0.454	20.5	2	7	33.532	29.2	0.394	534	534	413
35	95	284.62	4.59	32.25	59.72	35.61	32	0.52	0.96	0.57	1.6	62	20	61	19	0	19	0	0	0	15	0.246	0	0	42	19	1	0	0	0	0	80	80	78	78	3	11.784	1.702	1.803	0.291	40.5	2	17	96.634	128.1	0.413	4824	4824	4383
36	113	284.62	4.59	32.25	59.72	35.61	32	0.52	0.96	0.57	1.6	62	20	61	19	0	19	0	0	0	15	0.246	0	0	42	19	1	0	0	0	0	80	80	78	78	3	11.784	1.702	1.803	0.291	40.5	2	17	96.634	128.1	0.413	4824	4824	4383
37	99	307.61	5.04	33.05	59.05	36.1	36.5	0.54	0.97	0.59	1.66	61	22	61	22	5	24.5	0.227	1	1	15	0.246	0	5	39	20	2	0	1	0	0	92	130	95	134	5	14.674	1.886	1.948	0.261	45	2	20	109.991	151.455	0.402	6656	7686	6447
38	79	279.55	5.08	29.85	53.28	32.57	33.5	0.54	0.97	0.59	1.68	55	20	55	20	5	22.5	0.25	1	1	13	0.236	0	5	35	18	2	0	1	0	0	84	122	87	127	5	13.288	1.875	1.943	0.274	41	2	18	95.945	123.7	0.399	4944	5746	4757
39	58	251.49	5.13	26.66	47.52	29.05	30.5	0.54	0.97	0.59	1.69	49	18	49	18	5	20.5	0.278	1	1	11	0.224	0	5	31	16	2	0	1	0	0	76	114	79	118	5	11.901	1.862	1.937	0.29	37	2	16	82.279	98.667	0.395	3552	4202	3387
40	40	223.43	5.2	23.46	41.75	25.53	27.5	0.55	0.97	0.59	1.72	43	16	43	16	5	18.5	0.313	1	1	9	0.209	0	5	27	14	2	0	1	0	0	68	106	71	111	5	10.515	1.846	1.929	0.308	33	2	14	69.036	76.375	0.389	2448	2926	2305
41	52	304.6	5.08	33.05	57.95	36.09	36.5	0.55	0.97	0.6	1.66	60	22	60	22	6	25	0.273	1	1	15	0.25	0	6	38	21	1	0	0	1	0	90	122	92	126	4	14.962	1.941	1.974	0.259	44.5	1	21	110.004	151.546	0.402	6678	7724	6492
[truncated: 1,342 more columns]
